# Supplementary material for: Human xenobiotic metabolism proteins have full-length and split homologs in the gut microbiome
Source: PubMed Central journal article supplement (PMC11580864; doi:10.1101/2024.11.06.622278), 2024-11-08
Supplement: NIHPP2024.11.06.622278v1-supplement-1.pdf [file NIHPP2024.11.06.622278v1-supplement-1.pdf]

525

## 526 Supplementary Tables and Figures

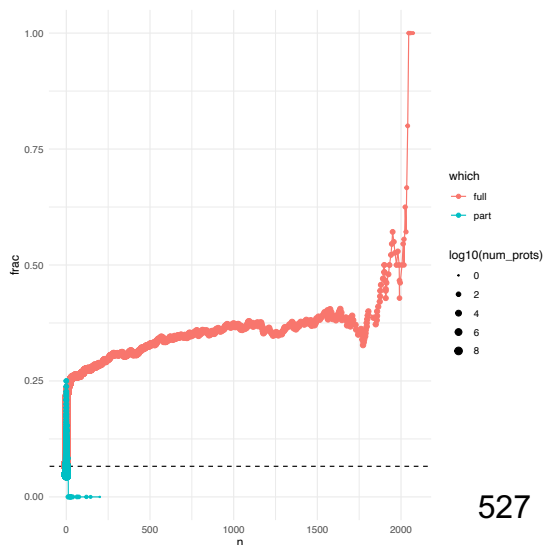

**Supplementary Figure 1: Trend in mitochondrial localization for full-length (orange) and split (teal) homologs, as a function of their distribution across gut species.** Each dot represents all microbial homologs present in at least a certain number of gut microbial species (x-axis). The size of the dot corresponds to the total number of such microbial homologs. The y-axis shows what fraction of the human homologs are annotated as localizing to the mitochondrion. The overall rate for all proteins is shown by the dashed line.

528

529 **Supplementary Table 1:** GO term enrichment (biological process) for human proteins with more full-length  
530 than split homologs. Terms with adjusted p-values below 0.05 are shown.

531 **Supplementary Table 2:** GO term enrichment (biological process) for human proteins with more split than  
532 full-length homologs. Terms with adjusted p-values below 0.05 are shown.

533 **Supplementary Table 3:** Drugs metabolized by human proteins with mostly full-length homologs in the gut  
534 microbiome.
